# Supplementary material for: Endothelial Dysfunction in Patients with Severe Mitral Regurgitation
Source: PubMed Central journal article supplement (PMC6616454; doi:10.3390/jcm8060835), 2019-06-12
Supplement: jcm-08-00835-s001.pdf [file jcm-08-00835-s001.pdf]

**Supplemental Figure S1. Flow cytometry workflow.**

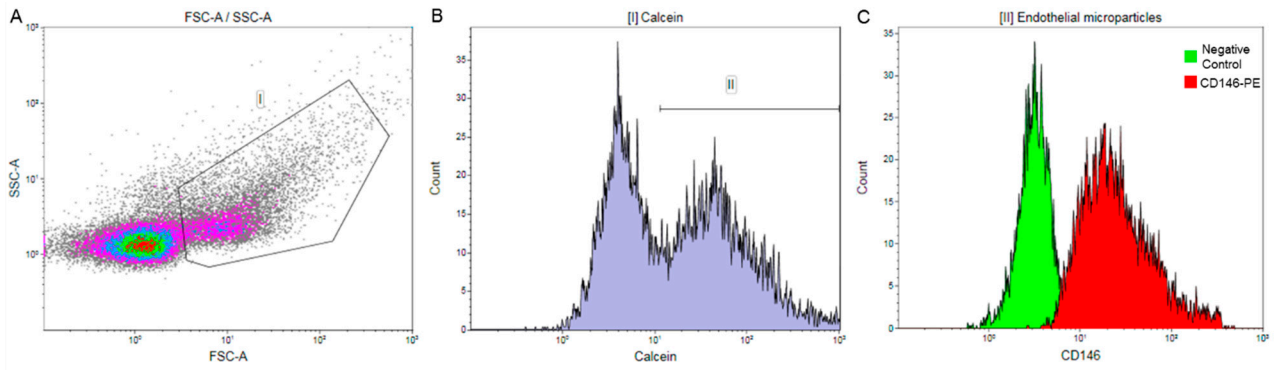

(A) Representative image of the scatter plot (Y axis: side scatter; X axis: forward scatter), reporting all acquired events. (B) Representative histogram showing events gated from [I], identified using Megamix-SSC Plus beads, and stained with calcein AM to detect intact microparticles. (C) Representative overlay of intact microparticles [II] unstained (negative control - green) and stained with a specific marker for endothelial released microparticles (CD146 - red) conjugated with phycoerythrin (PE).

**Supplemental Table S1.** Surgical procedural characteristics and post-operative clinical data of patients that underwent mitral valve repair.

| Variable                                      | MVP (n = 45) |
|-----------------------------------------------|--------------|
| Cardiopulmonary bypass time, min              | 114.7 ± 39.7 |
| Aorta clamping time, min                      | 92.2 ± 37.7  |
| 24h post-surgery – creatine kinase-MB, ng/mL  | 48.6 ± 25    |
| Intensive-care stay, days                     | 1.3 ± 0.7    |
| 24h post-surgery – atrial fibrillation, n (%) | 16 (35.6)    |
| At discharge – atrial fibrillation, n (%)     | 0 (0)        |
| Pacemaker implantation, n (%)                 | 2 (4.4)      |

Continuous variables are represented as mean ± SD.

**Supplemental Table S2.** Circulating plasma levels of Arginine and Citrulline.

| Variable        | Control<br>(n = 29) | MVP<br>(n = 45) |                              |
|-----------------|---------------------|-----------------|------------------------------|
|                 |                     | Pre-operative   | Post-operative<br>(6 months) |
| Arginine (μM)   | 80.8 ± 16.1         | 76.6 ± 18.2     | 70.8 ± 14.4 *                |
| Citrulline (μM) | 27.8 ± 7.9          | 29.8 ± 9.4      | 28.4 ± 6.6                   |

Data are reported as mean ± SD. \* p < 0.05 vs Controls-
